# Supplementary material for: Design of mechanically flexible photoresponsive cyanostilbene molecular crystals
Source: Royal Society of Chemistry journal article supplement (doi:10.1039/d4ce00571f), 2024-01-01
Supplement: d4ce00571f1.pdf [file d4ce00571f1.pdf]

## **Electronic Supporting Information**

### **Design of Mechanically Flexible Photoresponsive Cyanostilbene Molecular Crystals**

*Thiyagaraj Parthasarathy,<sup>a</sup> Biswajit Bhattacharya,<sup>b</sup> Franziska Emmerling,<sup>b</sup> Soumyajit Ghosh<sup>\*a</sup>*

<sup>a</sup>Department of Chemistry, SRM Institute of Science and Technology, Kattankulathur 603 203, Tamil Nadu, India.

<sup>b</sup>BAM Federal Institute for Materials Research and Testing, Richard-Willstätter-Str. 11, 12489 Berlin, Germany.

\* Email: [soumyajitghosh89@gmail.com](mailto:soumyajitghosh89@gmail.com)

---

| <b>Table of Contents</b>                         | <b>Page No</b> |
|--------------------------------------------------|----------------|
| Synthesis Scheme                                 | S3             |
| Recrystallization Table                          | S3             |
| NMR Spectroscopy                                 | S5             |
| Differential Scanning Calorimetry (DSC) Analysis | S5             |
| Face Indexing Image                              | S6             |
| Crystal Packing Image                            | S6             |
| Energy Framework Calculations                    | S7-S8          |
| Photosalient Bending Images of <b>BN</b> Crystal | S8             |
| PXRD Analysis                                    | S9             |
| Crystallographic Information Table               | S9             |

## Synthesis Scheme.

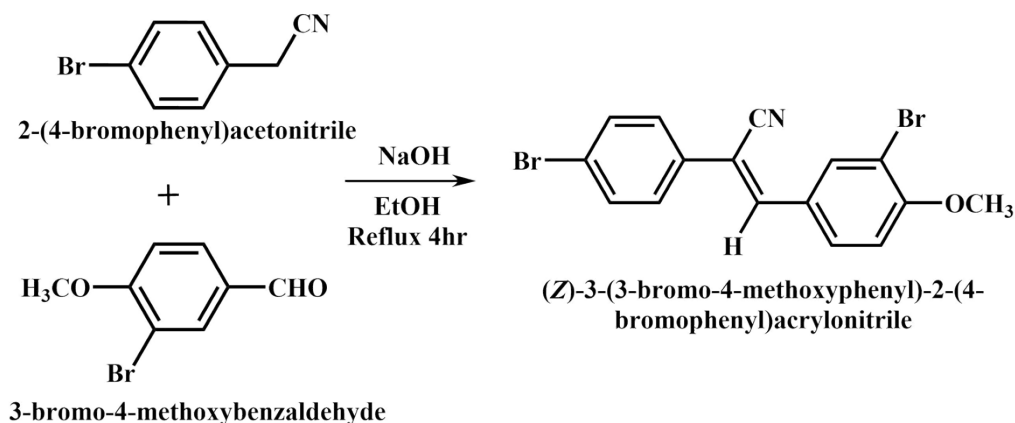

**Scheme S1.** Synthesis route of compound **BN**

The compound **BN** was synthesized following the reported procedure.<sup>1</sup> In a 100 ml round-bottom flask, 4-bromophenylacetonitrile (1 equivalent) was mixed with 15 ml ethanol and 3-bromo-4-methoxybenzaldehyde (1 equivalent). A catalytic amount of NaOH (10 mol %) was added, and the mixture was stirred and refluxed for 6 hours. The product, a white precipitate, was then filtered and dried, achieving an 87% yield.

## Recrystallization Table.

**Table S1:** Results from the recrystallization of Compound **BN** from one solvent or mixture of solvents.

| S.No. | Solvents                       | Compound <b>BN</b> |
|-------|--------------------------------|--------------------|
| 1.    | Ethyl Acetate + n-Hexane (1:1) | Powder             |
| 2.    | Dichloromethane + Methanol     | Powder             |

|    |                                |              |
|----|--------------------------------|--------------|
|    | (1:1)                          |              |
| 3. | Ethyl Acetate + Methanol (1:1) | Powder       |
| 4. | Ethyl Acetate + n-Hexane (1:1) | Powder       |
| 5. | Acetonitrile                   | Powder       |
| 6. | Methanol                       | Fine Needles |
| 7. | Methanol + Chloroform (1:1)    | Fine Needles |
| 8. | Chloroform                     | Powder       |

### Nuclear Magnetic Resonance (NMR) Analysis.

<sup>1</sup>H NMR spectra of crystal **BN** were taken in CDCl<sub>3</sub> solvent. <sup>1</sup>H NMR spectra were collected under standard conditions. Chemical shifts ( $\delta$ ) were reported in parts per million (ppm) and referenced to the residual solvent peak at 7.26 ppm for the CDCl<sub>3</sub> solvent peak.

**Crystal BN:** <sup>1</sup>H NMR (500 MHz, CDCl<sub>3</sub>, TMS)  $\delta$  7.99 (dd,  $J$  = 14.9, 5.2 Hz, 2H, Ar-H), 7.59 (d,  $J$  = 8.7 Hz, 2H, Ar-H), 7.53 (d,  $J$  = 8.7 Hz, 2H, Ar-H), 7.40 (s, 1H, -CH=CCN), 7.01 (d,  $J$  = 8.6 Hz, 1H, Ar-H), 3.97 (s, 3H, methoxy-H).

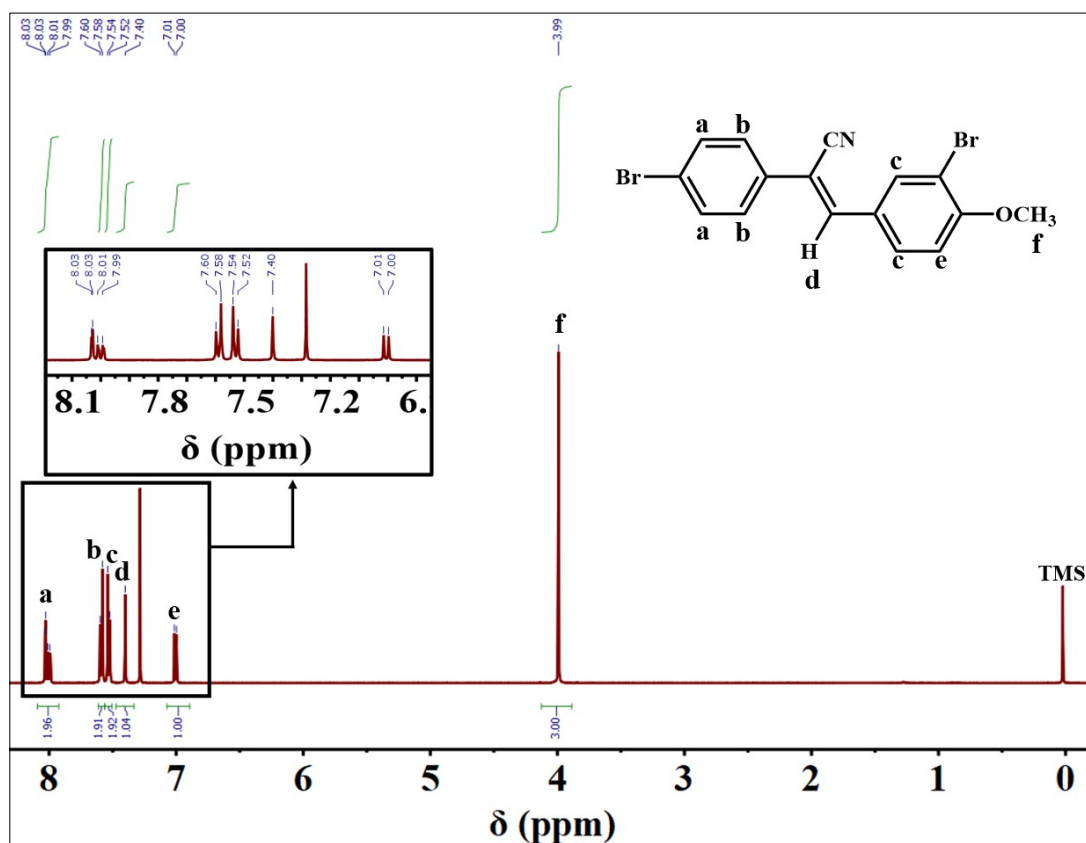

Figure S1.  $^1\text{H}$  NMR spectrum of crystal BN (solvent:  $\text{CDCl}_3$ , peak at 7.26 ppm)

### Differential Scanning Calorimetry (DSC) Analysis.

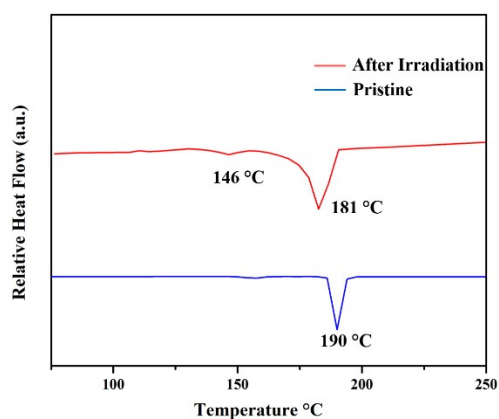

Figure S2. Comparative Differential Scanning Calorimetry (DSC) profile of crystal BN before and after irradiation.

## Face Indexing Image.

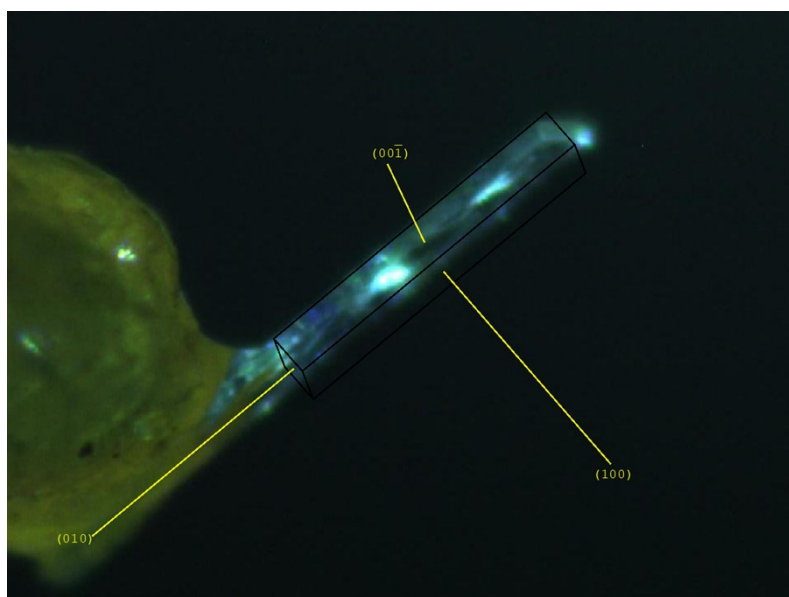

Figure S3. Face indexing image of crystal BN.

## Crystal Packing Image.

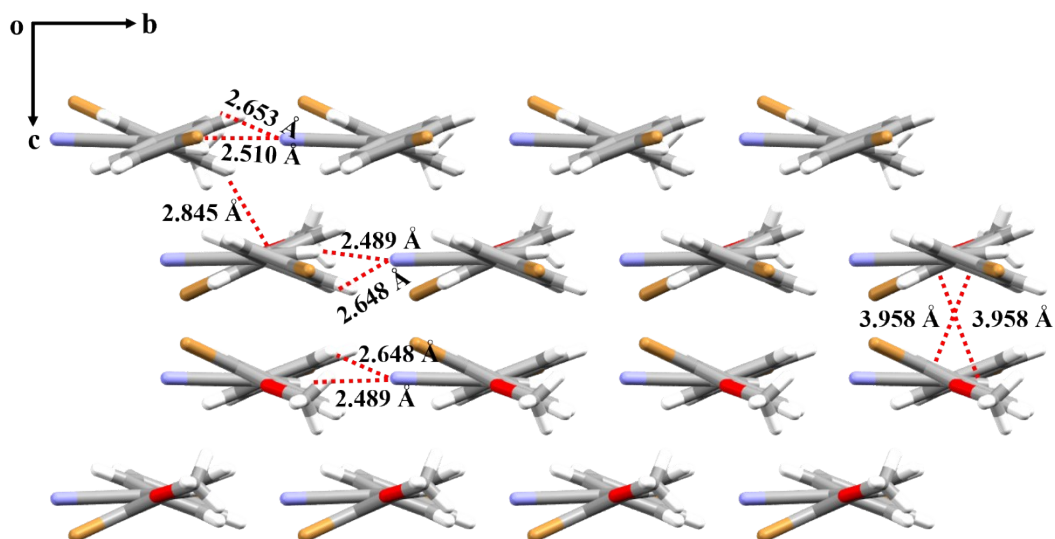

Figure S4. BN crystal packing viewed along *a*-axis.

## Energy Framework Calculations.

The energy framework calculations<sup>2,3</sup> relating to intermolecular interactions of crystal **BN** were performed using the software suite Crystal-Explorer based on B3LYP/6-31G(d,p) molecular wavefunctions calculated using the CIF files. For calculations, the hydrogen atoms were normalized to standard neutron diffraction values. The energy frameworks constructed were based on the crystal symmetry and total interaction energy components which included electrostatic, polarization, dispersion, and exchange repulsion components scaled by 1.057, 0.740, 0.871, and 0.618, respectively. The interaction energies below 5 kJ.mol<sup>-1</sup> are omitted for clarity and the cylinder thickness is proportional to the intermolecular interaction energies along the parallel vector passing through the cylinder.

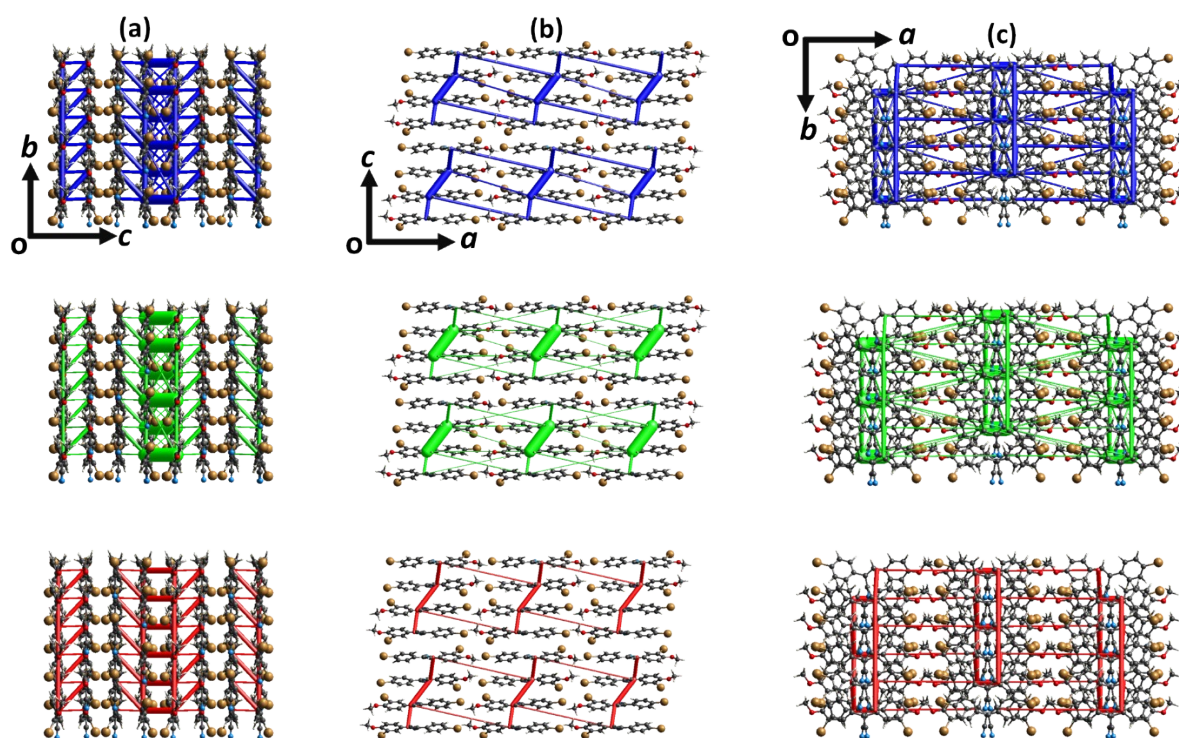

**Figure S5.** Visualization of energy frameworks showing total interaction energy (top, blue), dispersion (middle, green), and electrostatic (below, red) components crystal **BN**, in the (a) (100), (b) (010) and (c) (001) faces, respectively. The energy threshold is 5 kJ.mol<sup>-1</sup>.

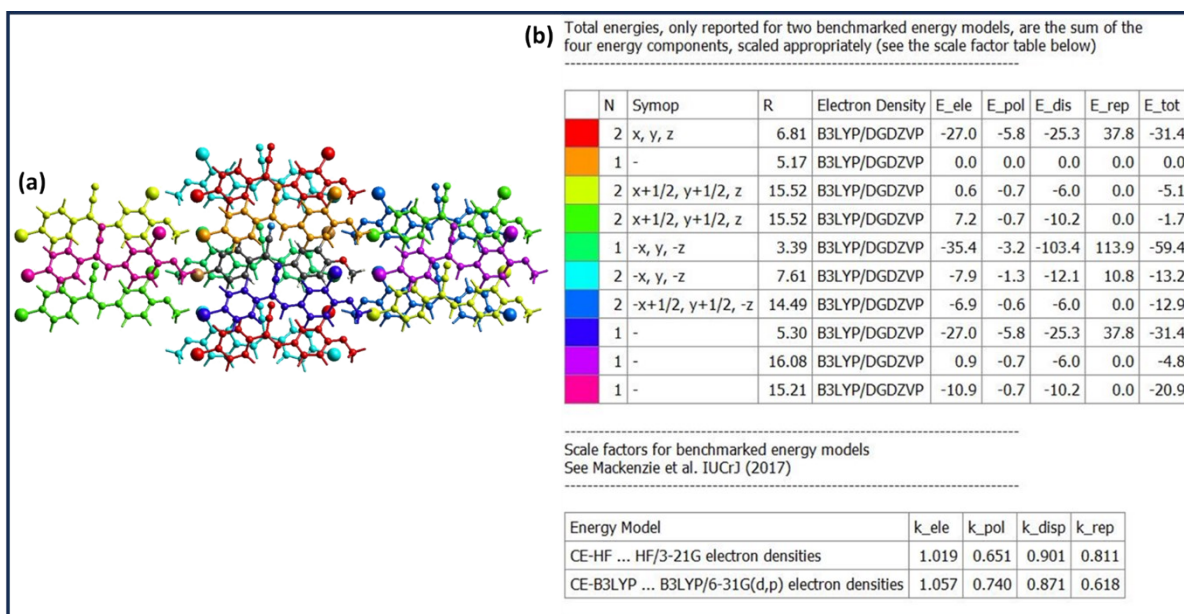

**Table S2.** (a) Molecular structure pairs and (b) the interaction energies ( $\text{kJ}\cdot\text{mol}^{-1}$ ) obtained from energy frameworks calculation for crystal BN. Scale factors are in the lower table.

### Photomechanical Bending Images of BN Crystal.

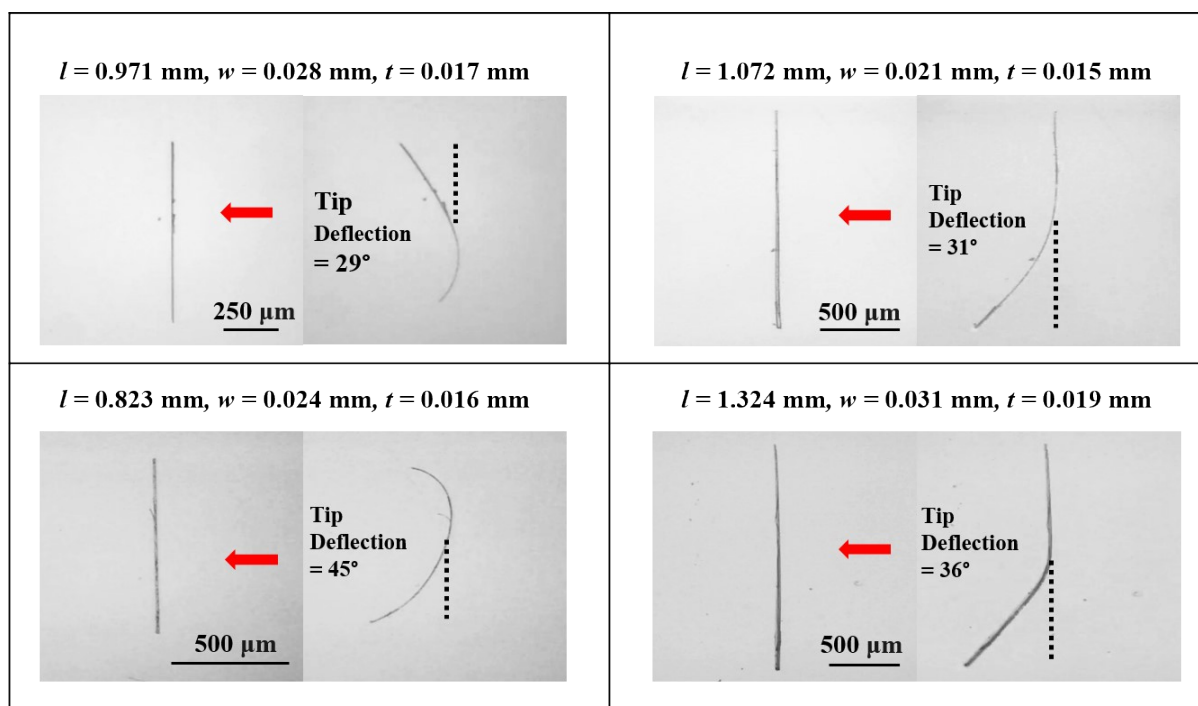

**Figure S6.** Photomechanical bending images of a set of different dimension crystals of BN.

Red arrows denote the direction of the LED source.



## Powder X-Ray Diffraction

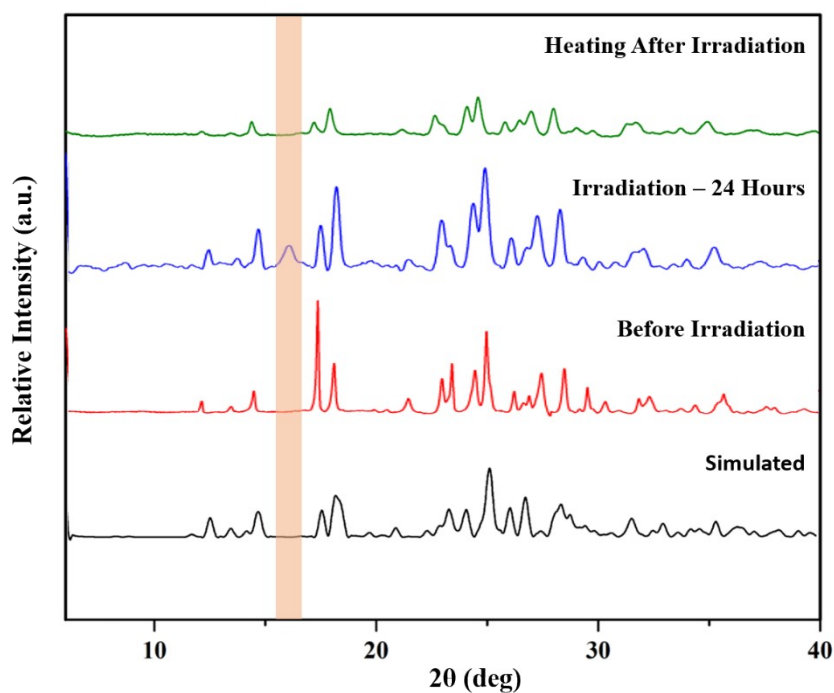

**Figure S7.** Comparative PXRD profile of crystal **BN** depicting simulated pattern, pristine sample, photoirradiated sample and photoirradiated sample followed by heating.

### Crystallographic Information Table.

**Table S3:** Crystallographic Information Table.

| Compound         | Crystal BN           |
|------------------|----------------------|
| Formula          | $C_{16}H_{11}Br_2NO$ |
| Molecular weight | 393.08               |
| T/K              | 150                  |
| Crystal system   | monoclinic           |
| Space group      | $C2$                 |
| $a/\text{\AA}$   | 30.2798(12)          |
| $b/\text{\AA}$   | 6.8134(3)            |
| $c/\text{\AA}$   | 14.1349(6)           |
| $\alpha/^\circ$  | 90                   |
| $\beta/^\circ$   | 93.921(2)            |

|                              |           |
|------------------------------|-----------|
| $\gamma/^\circ$              | 90        |
| Volume/ $\text{\AA}^3$       | 2909.3(2) |
| Z                            | 8         |
| $\rho$ , Mg.cm <sup>-3</sup> | 1.795     |
| $\mu$ /mm <sup>-1</sup>      | 5.566     |
| Reflections collected        | 28451     |
| Independent Reflections      | 6463      |
| R <sub>int</sub>             | 0.0584    |
| GOF                          | 1.107     |
| Final R[I>2 $\sigma$ ]       | 0.0485    |
| wR <sub>2</sub>              | 0.1320    |
| CCDC Number                  | 2339475   |

## References.

1. K. Rorig, *J. Am. Chem. Soc.*, 1953, **75**, 5381-5383.
2. M. J. Turner, S. P. Thomas, M. W. Shi, D. Jayatilaka and M. A. Spackman, *Chem. Commun.*, 2015, **51**, 3735-3738.
3. P. R. Spackman, M. J. Turner, J. J. McKinnon, S. K. Wolff, D. J. Grimwood, D. Jayatilaka and M. A. Spackman, *J. Appl. Crystallogr.*, 2021, **54**, 1006-1011.
